# Supplementary material
Source: PubMed Central journal article supplement (PMC4374148)
Supplement: NIHMS62292-supplement-NA.pdf [file NIHMS62292-supplement-NA.pdf]

# THE LANCET

## **Supplementary appendix**

This appendix formed part of the original submission and has been peer reviewed. We post it as supplied by the authors.

Supplement to: Köser CU, Javid B, Liddell K, et al. Drug-resistance mechanisms and tuberculosis drugs. *Lancet* 2015; **385**: 305–307.

## Appendix

Depending on the nature of the resistance mechanism(s) to a novel antibiotic, not all technologies may be appropriate to detect them. Rapid molecular assays, such as the Cepheid GeneXpert system, can be used directly on clinical samples but only interrogate short stretches of bacterial DNA.<sup>1</sup> In the case of PA-824 (pretomanid) resistance can arise through mutations in five non-essential genes (*fgd1*, *fbiC*, *fbiA*, *fbiB* and *ddn*) with a total length of 6.4 kilobase pairs.<sup>2-4</sup> Therefore phenotypic drug-susceptibility testing or rapid whole-genome sequencing might be the only diagnostic option to detect resistance to this agent,<sup>5, 6</sup> unless one particular set(s) of mutations are found to be dominant in clinical isolates, as is the case with *katG* mutations and high-level isoniazid resistance.<sup>7, 8</sup> Irrespective of the technology used, a comprehensive understanding of the natural diversity in the resistance gene(s) for each antibiotic is crucial to avoid systematic false-positive results due to polymorphisms that do not cause resistance.<sup>9-12</sup>

The study of large collections of *in vitro* and *in vivo* mutants to correlate different mutations with minimum inhibitory concentrations (MICs) might inform the design of pre-clinical and clinical trials and, subsequently, improved diagnostic and screening tests.<sup>12</sup> If certain mechanisms or mutations led to only marginally elevated MICs (as is the case with *inhA* mutations and isoniazid<sup>9</sup> or with certain *rpoB* mutations and rifampicin<sup>13</sup>), higher doses or more frequent dosing of the novel therapeutic agent to overcome this low level of resistance could be evaluated.<sup>14</sup> This would benefit patients, clinicians and pharmaceutical companies by increasing the number of TB cases that could be treated with that particular drug. The resulting knowledge could also be used to determine appropriate breakpoints for phenotypic assays – which is not straightforward for MTBC<sup>15, 16</sup> – and to validate the reliability of these assays.<sup>17</sup> Finally, individual mutants could be used to quantify the risk of developing further resistance, as certain low-level resistance mechanisms have been found to increase the chance of developing high-level resistance.<sup>11, 18</sup>

## Acknowledgments

We thank Rachel Atfield (Cambridge Enterprise) and Ryoko Sakuraba (Kobe University) for their help with searching patent databases and Robert Shafer (Stanford University) for useful discussions regarding HIV drug development and for reviewing this manuscript. This opinion piece is based on work done by Claudio Köser as a Gates Cambridge Scholar and a Public Health England (PHE) employee. Claudio Köser now is a Junior Research Fellow at Wolfson College, Cambridge. Ibrahim Abubakar is funded by PHE, the National Institute for Health Research and the Medical Research Council. Sharon Peacock is supported by a grant from the UK Department of Health, Wellcome Trust and the Health Innovation Challenge Fund (HICF-T5-342 and WT098600). Estée Török is a Clinician Scientist Fellow funded by the Academy of Medical Sciences and the Health Foundation.

## References

1. Lawn SD, Mwaba P, Bates M, et al. Advances in tuberculosis diagnostics: the Xpert MTB/RIF assay and future prospects for a point-of-care test. *Lancet Infect Dis* 2013; **13**(4): 349-61.
2. Feuerriegel S, Köser CU, Baù D, et al. Impact of *fgd1* and *ddn* diversity in *Mycobacterium tuberculosis* complex on *in vitro* susceptibility to PA-824. *Antimicrob Agents Chemother* 2011; **55**(12): 5718-22.
3. Zumla A, Raviglione M, Hafner R, von Reyn CF. Tuberculosis. *N Engl J Med* 2013; **368**(8): 745-55.
4. Bagcchi S. Novel drug combination for tuberculosis to be tested across 50 sites. *BMJ* 2014; **348**: g3535.
5. Köser CU, Bryant JM, Becq J, et al. Whole-genome sequencing for rapid susceptibility testing of *M. tuberculosis*. *N Engl J Med* 2013; **369**(3): 290-2.
6. Köser CU, Ellington MJ, Cartwright EJ, et al. Routine use of microbial whole genome sequencing in diagnostic and public health microbiology. *PLoS Pathog* 2012; **8**(8): e1002824.
7. Bergval IL, Schuitema AR, Klatser PR, Anthony RM. Resistant mutants of *Mycobacterium tuberculosis* selected *in vitro* do not reflect the *in vivo* mechanism of isoniazid resistance. *J Antimicrob Chemother* 2009; **64**(3): 515-23.
8. Müller B, Borrell S, Rose G, Gagneux S. The heterogeneous evolution of multidrug-resistant *Mycobacterium tuberculosis*. *Trends Genet* 2013; **29**(3): 160-9.
9. Köser CU, Feuerriegel S, Summers DK, Archer JA, Niemann S. Importance of the genetic diversity within the *Mycobacterium tuberculosis* complex for the development of novel antibiotics and diagnostic tests of drug resistance. *Antimicrob Agents Chemother* 2012; **56**(12): 6080-7.
10. Feuerriegel S, Köser CU, Niemann S. Phylogenetic polymorphisms in antibiotic resistance genes of the *Mycobacterium tuberculosis* complex. *J Antimicrob Chemother* 2014; **69**(5): 1205-10.
11. Köser CU, Bryant JM, Parkhill J, Peacock SJ. Consequences of *whiB7* (*Rv3197A*) mutations in Beijing genotype isolates of the *Mycobacterium tuberculosis* complex. *Antimicrob Agents Chemother* 2013; **57**(7): 3461.
12. Köser CU, Ellington MJ, Peacock SJ. Whole-genome sequencing to control antimicrobial resistance. *Trends Genet* 2014; **30**(9): 401-7.
13. van Ingen J, Aarnoutse R, de Vries G, Boeree MJ, van Soolingen D. Low-level rifampicin-resistant *Mycobacterium tuberculosis* strains raise a new therapeutic challenge. *Int J Tuberc Lung Dis* 2011; **15**(7): 990-2.
14. Andries K, Vilellas C, Coeck N, et al. Acquired resistance of *Mycobacterium tuberculosis* to bedaquiline. *PLoS One* 2014; **9**(7): e102135.
15. Böttger EC. The ins and outs of *Mycobacterium tuberculosis* drug susceptibility testing. *Clin Microbiol Infect* 2011; **17**(8): 1128-34.
16. Ängeby K, Juréen P, Kahlmeter G, Hoffner SE, Schön T. Challenging a dogma: antimicrobial susceptibility testing breakpoints for *Mycobacterium tuberculosis*. *Bull World Health Organ* 2012; **90**(9): 693-8.
17. Simons SO, van Ingen J, van der Laan T, et al. Validation of *pncA* gene sequencing in combination with the mycobacterial growth indicator tube method to test susceptibility of *Mycobacterium tuberculosis* to pyrazinamide. *J Clin Microbiol* 2012; **50**(2): 428-34.
18. Palmer AC, Kishony R. Understanding, predicting and manipulating the genotypic evolution of antibiotic resistance. *Nat Rev Genet* 2013; **14**(4): 243-8.
